# Supplementary material
Source: PubMed Central journal article supplement (PMC7772959)
Supplement: NIHMS1657081-supplement-Suppleemntary.pdf [file NIHMS1657081-supplement-Suppleemntary.pdf]

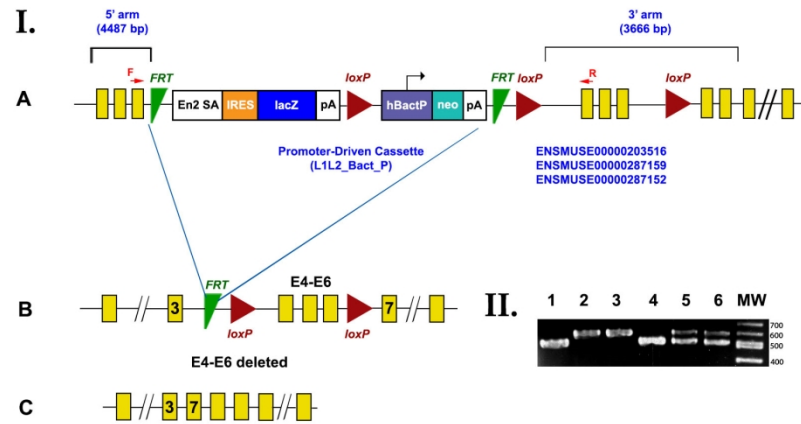

169x77mm (300 x 300 DPI)

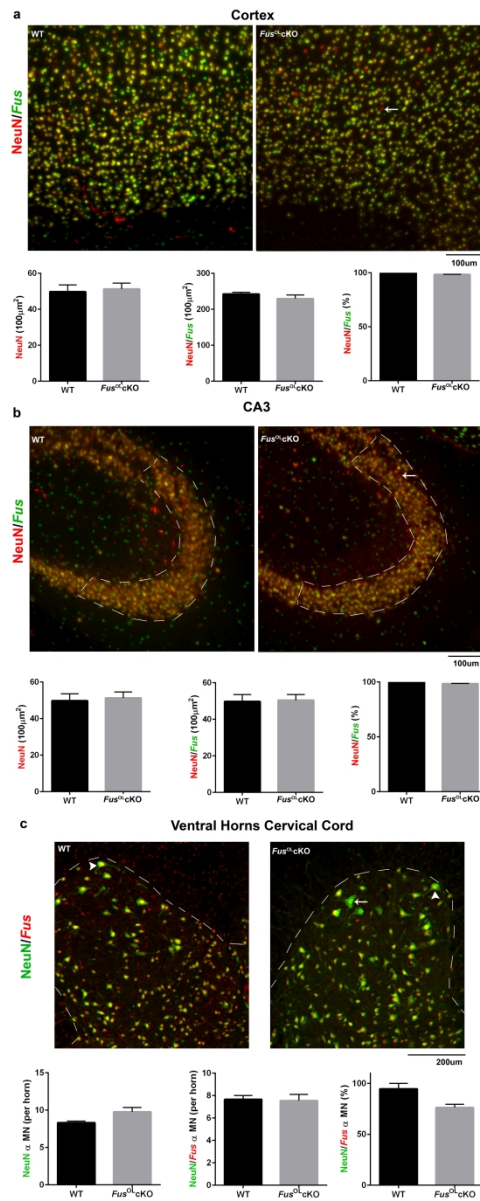

218x539mm (300 x 300 DPI)

**Table S1**

List of primary Antibodies used for WB

| <b>1° Antibody</b> | <b>Company</b>    | <b>Catalog No.</b> | <b>Source</b> | <b>Target Size</b> | <b>W.B.</b> |
|--------------------|-------------------|--------------------|---------------|--------------------|-------------|
| Akt (pan)          | Cell Signaling    | 4691               | Rabbit        | 60                 | 1/1000      |
| p-Akt              | Cell Signaling    | 9271               | Rabbit        | 60                 | 1/1000      |
| HMGCR              | Abcam             | ab174830           | Rabbit        | 96                 | 1/1000      |
| p44/42 (Erk1/2)    | Cell Signaling    | 4696               | Mouse         | 42, 44             | 1/1000      |
| P-44/42 (p-Erk1/2) | Cell Signaling    | 4377               | Rabbit        | 42, 44             | 1/500       |
| Mtor               | Cell Signaling    | 2983               | Rabbit        | 289                | 1/1000      |
| p-mTOR             | Cell Signaling    | 2974               | Rabbit        | 289                | 1/500       |
| p-S6 RP            | Cell Signaling    | 5364               | Rabbit        | 32                 | 1/1000      |
| GAPDH              | Thermo            | MA5-15738          | Mouse         | 37                 | 1/3000      |
| GAPDH              | Abcam             | Ab9485             | Rabbit        | 37                 | 1/2500      |
| U1A                | Abcam             | Ab55751            | Mouse         | 34                 | 1/2500      |
| MAG                | Santa Cruz        | Sc-9544            | Goat          | 115                | 1/1000      |
| MBP                | Abcam             | Ab40390            | Rabbit        | 14-21              | 1/1000      |
| MBP                | Biologend         | Ab808401           | Mouse         | 14-21              | 1/1000      |
| FUS                | Bethyl Labs       | A300-302A          | Rabbit        | 70                 | 1/1000      |
| PLP                | Dr. Wendy Macklin | AA3                | Rat           | 18-25              | 1/1000      |

| Motif sequence for FUS target genes | Note                                      | Reference |
|-------------------------------------|-------------------------------------------|-----------|
| 5'-CAGVACDGCCWG-3'                  | V=(A, C or G), D=(A, G, or T), W=(A or T) | ref. 42   |

#### FIMO report

| Column name  | Note                                       | Reference |
|--------------|--------------------------------------------|-----------|
| Gene name    |                                            |           |
| Chr ID       | The chromosome ID                          |           |
| Gene start   | The start coordinate of the gene           |           |
| Gene end     | The end coordinate of the gene             |           |
| Gene strand  | The strand information of the gene         | NCBI      |
| Motif start  | The start position of the motif occurrence |           |
| Motif stop   | The end position of the motif occurrence   |           |
| Motif strand | Strand of the predicted motif              |           |
| Score        | The score for the motif occurrence         |           |
| P-value      | The p-value of the motif occurrence        | FIMO      |

#### Total FIMO score by gene

| Column name      | Note                                     |         |
|------------------|------------------------------------------|---------|
| Gene name        | Gene name                                |         |
| Total FIMO score | The sum of all FIMO scores per each gene |         |
| PAR-CLIP         |                                          | ref. 48 |

| Gene name | Chr ID | Gene start | Gene end | Gene strand | Motif start | Motif stop | Motif strand | Score   |
|-----------|--------|------------|----------|-------------|-------------|------------|--------------|---------|
| INSIG2    | chr1   | 1.21E+08   | 1.21E+08 | -           | 19794       | 19805      | -            | 14.1818 |
| HSD17B7   | chr1   | 1.7E+08    | 1.7E+08  | -           | 353         | 364        | -            | 13.903  |
| HSD17B7   | chr1   | 1.7E+08    | 1.7E+08  | -           | 12467       | 12478      | -            | 13.903  |
| INSIG2    | chr1   | 1.21E+08   | 1.21E+08 | -           | 13002       | 13013      | -            | 13.6364 |
| INSIG2    | chr1   | 1.21E+08   | 1.21E+08 | -           | 4808        | 4819       | -            | 10.4667 |
| INSIG2    | chr1   | 1.21E+08   | 1.21E+08 | -           | 25323       | 25334      | -            | 10.2    |
| INSIG2    | chr1   | 1.21E+08   | 1.21E+08 | -           | 23884       | 23895      | -            | 10.1879 |
| HSD17B7   | chr1   | 1.7E+08    | 1.7E+08  | -           | 991         | 1002       | -            | 8.95758 |
| INSIG2    | chr1   | 1.21E+08   | 1.21E+08 | -           | 16899       | 16910      | -            | 8.95758 |
| INSIG2    | chr1   | 1.21E+08   | 1.21E+08 | -           | 23718       | 23729      | -            | 8.94545 |
| LSS       | chr10  | 76531588   | 76557138 | +           | 24967       | 24978      | +            | 19.4061 |
| LSS       | chr10  | 76531588   | 76557138 | +           | 5777        | 5788       | +            | 10.1879 |
| LSS       | chr10  | 76531588   | 76557138 | +           | 12905       | 12916      | +            | 8.95758 |
| LSS       | chr10  | 76531588   | 76557138 | +           | 13017       | 13028      | +            | 8.95758 |
| LSS       | chr10  | 76531588   | 76557138 | +           | 13255       | 13266      | +            | 8.95758 |
| LSS       | chr10  | 76531588   | 76557138 | +           | 19434       | 19445      | +            | 8.94545 |
| SREBF1    | chr11  | 60199089   | 60222581 | -           | 1167        | 1178       | -            | 19.4061 |
| SREBF1    | chr11  | 60199089   | 60222581 | -           | 8094        | 8105       | -            | 19.4061 |
| SEC14L2   | chr11  | 4097039    | 4123415  | -           | 8487        | 8498       | -            | 19.4061 |
| NPC1L1    | chr11  | 6211013    | 6230143  | -           | 13547       | 13558      | -            | 19.4061 |
| NPC1L1    | chr11  | 6211013    | 6230143  | -           | 14328       | 14339      | -            | 19.4061 |
| SEC14L2   | chr11  | 4097039    | 4123415  | -           | 16967       | 16978      | -            | 19.4061 |
| SEC14L2   | chr11  | 4097039    | 4123415  | -           | 6675        | 6686       | -            | 14.1697 |
| SEC14L2   | chr11  | 4097039    | 4123415  | -           | 4181        | 4192       | -            | 13.903  |
| NPC1L1    | chr11  | 6211013    | 6230143  | -           | 6925        | 6936       | -            | 13.903  |
| SEC14L2   | chr11  | 4097039    | 4123415  | -           | 17351       | 17362      | -            | 13.903  |
| SREBF1    | chr11  | 60199089   | 60222581 | -           | 18385       | 18396      | -            | 13.903  |
| SEC14L2   | chr11  | 4097039    | 4123415  | -           | 5482        | 5493       | -            | 13.6364 |
| NPC1L1    | chr11  | 6211013    | 6230143  | -           | 7663        | 7674       | -            | 13.6364 |
| SREBF1    | chr11  | 60199089   | 60222581 | -           | 16269       | 16280      | -            | 9.92121 |
| SREBF1    | chr11  | 60199089   | 60222581 | -           | 3135        | 3146       | -            | 9.63636 |
| SREBF1    | chr11  | 60199089   | 60222581 | -           | 17494       | 17505      | -            | 9.63636 |
| SREBF1    | chr11  | 60199089   | 60222581 | -           | 21214       | 21225      | -            | 9.63636 |
| SREBF1    | chr11  | 60199089   | 60222581 | -           | 6629        | 6640       | -            | 9.3697  |
| SEC14L2   | chr11  | 4097039    | 4123415  | -           | 21534       | 21545      | -            | 9.3697  |
| SREBF1    | chr11  | 60199089   | 60222581 | -           | 2329        | 2340       | -            | 9.22424 |
| SREBF1    | chr11  | 60199089   | 60222581 | -           | 19122       | 19133      | -            | 8.95758 |
| SEC14L2   | chr11  | 4097039    | 4123415  | -           | 26129       | 26140      | -            | 8.95758 |
| SREBF1    | chr11  | 60199089   | 60222581 | -           | 822         | 833        | -            | 8.94545 |
| SREBF1    | chr11  | 60199089   | 60222581 | -           | 2081        | 2092       | -            | 8.94545 |
| SREBF1    | chr11  | 60199089   | 60222581 | -           | 3486        | 3497       | -            | 8.94545 |
| SREBF1    | chr11  | 60199089   | 60222581 | -           | 18725       | 18736      | -            | 8.94545 |
| SREBF1    | chr11  | 60199089   | 60222581 | -           | 21744       | 21755      | -            | 8.94545 |
| SEC14L2   | chr11  | 4097039    | 4123415  | -           | 9743        | 9754       | -            | 8.69091 |
| SEC14L2   | chr11  | 4097039    | 4123415  | -           | 18485       | 18496      | -            | 8.69091 |
| APOB      | chr12  | 7977648    | 8016835  | +           | 23756       | 23767      | +            | 19.4061 |
| APOB      | chr12  | 7977648    | 8016835  | +           | 26487       | 26498      | +            | 14.8727 |
| APOB      | chr12  | 7977648    | 8016835  | +           | 36325       | 36336      | +            | 13.903  |
| APOB      | chr12  | 7977648    | 8016835  | +           | 37689       | 37700      | +            | 13.6364 |
| APOB      | chr12  | 7977648    | 8016835  | +           | 7681        | 7692       | +            | 9.92121 |
| IDI2      | chr13  | 8952863    | 8960945  | +           | 883         | 894        | +            | 19.4061 |

|        |       |          |            |       |         |         |
|--------|-------|----------|------------|-------|---------|---------|
| IDI2   | chr13 | 8952863  | 8960945 +  | 3344  | 3355 +  | 19.4061 |
| HMGCS1 | chr13 | 1.2E+08  | 1.2E+08 +  | 11294 | 11305 + | 19.4061 |
| HMGCS1 | chr13 | 1.2E+08  | 1.2E+08 +  | 13764 | 13775 + | 19.4061 |
| HMGCS1 | chr13 | 1.2E+08  | 1.2E+08 +  | 2930  | 2941 +  | 14.1818 |
| IDI2   | chr13 | 8952863  | 8960945 +  | 2137  | 2148 +  | 13.903  |
| IDI2   | chr13 | 8952863  | 8960945 +  | 3687  | 3698 +  | 13.903  |
| HMGCS1 | chr13 | 1.2E+08  | 1.2E+08 +  | 12485 | 12496 + | 13.903  |
| HMGCR  | chr13 | 96648967 | 96670936 - | 14570 | 14581 - | 13.903  |
| IDI2   | chr13 | 8952863  | 8960945 +  | 7046  | 7057 +  | 13.6364 |
| HMGCR  | chr13 | 96648967 | 96670936 - | 10539 | 10550 - | 10.2    |
| HMGCR  | chr13 | 96648967 | 96670936 - | 11758 | 11769 - | 9.63636 |
| FDFT1  | chr14 | 63145150 | 63179578 - | 4634  | 4645 -  | 19.4061 |
| FDFT1  | chr14 | 63145150 | 63179578 - | 8009  | 8020 -  | 19.4061 |
| FDFT1  | chr14 | 63145150 | 63179578 - | 33528 | 33539 - | 14.1818 |
| FDFT1  | chr14 | 63145150 | 63179578 - | 3092  | 3103 -  | 13.903  |
| FDFT1  | chr14 | 63145150 | 63179578 - | 20179 | 20190 - | 9.92121 |
| FDFT1  | chr14 | 63145150 | 63179578 - | 21848 | 21859 - | 9.92121 |
| FDFT1  | chr14 | 63145150 | 63179578 - | 27133 | 27144 - | 8.94545 |
| PRKAA1 | chr15 | 5143861  | 5181899 +  | 6808  | 6819 +  | 19.4061 |
| CYB5R3 | chr15 | 83153494 | 83172592 - | 8945  | 8956 -  | 19.4061 |
| CYB5R3 | chr15 | 83153494 | 83172592 - | 3504  | 3515 -  | 13.903  |
| PRKAA1 | chr15 | 5143861  | 5181899 +  | 4016  | 4027 +  | 13.903  |
| CYB5R3 | chr15 | 83153494 | 83172592 - | 5756  | 5767 -  | 13.903  |
| CYB5R3 | chr15 | 83153494 | 83172592 - | 8428  | 8439 -  | 13.903  |
| CYB5R3 | chr15 | 83153494 | 83172592 - | 9578  | 9589 -  | 13.903  |
| CYB5R3 | chr15 | 83153494 | 83172592 - | 11930 | 11941 - | 13.903  |
| CYB5R3 | chr15 | 83153494 | 83172592 - | 16129 | 16140 - | 13.903  |
| PRKAA1 | chr15 | 5143861  | 5181899 +  | 31520 | 31531 + | 13.903  |
| PRKAA1 | chr15 | 5143861  | 5181899 +  | 31211 | 31222 + | 9.92121 |
| CYB5R3 | chr15 | 83153494 | 83172592 - | 12430 | 12441 - | 9.90303 |
| CYB5R3 | chr15 | 83153494 | 83172592 - | 12104 | 12115 - | 9.63636 |
| CYB5R3 | chr15 | 83153494 | 83172592 - | 10421 | 10432 - | 8.94545 |
| SOD1   | chr16 | 90220754 | 90226329 + | 3734  | 3745 +  | 13.6364 |
| SOD1   | chr16 | 90220754 | 90226329 + | 3940  | 3951 +  | 9.92121 |
| SOD1   | chr16 | 90220754 | 90226329 + | 246   | 257 +   | 8.94545 |
| ABCG1  | chr17 | 31057675 | 31117988 + | 4340  | 4351 +  | 19.4061 |
| ABCG1  | chr17 | 31057675 | 31117988 + | 12024 | 12035 + | 19.4061 |
| ABCG1  | chr17 | 31057675 | 31117988 + | 12053 | 12064 + | 19.4061 |
| ABCG1  | chr17 | 31057675 | 31117988 + | 38413 | 38424 + | 19.4061 |
| ABCG1  | chr17 | 31057675 | 31117988 + | 38132 | 38143 + | 19.1394 |
| ABCG1  | chr17 | 31057675 | 31117988 + | 52452 | 52463 + | 14.4485 |
| ABCG1  | chr17 | 31057675 | 31117988 + | 10256 | 10267 + | 13.903  |
| ABCG1  | chr17 | 31057675 | 31117988 + | 42489 | 42500 + | 13.903  |
| ABCG1  | chr17 | 31057675 | 31117988 + | 52862 | 52873 + | 13.903  |
| ABCG1  | chr17 | 31057675 | 31117988 + | 30368 | 30379 + | 9.91515 |
| ABCG1  | chr17 | 31057675 | 31117988 + | 14614 | 14625 + | 9.63636 |
| ABCG1  | chr17 | 31057675 | 31117988 + | 56339 | 56350 + | 8.94545 |
| FGF1   | chr18 | 38838673 | 38929472 - | 11818 | 11829 - | 19.4061 |
| FGF1   | chr18 | 38838673 | 38929472 - | 24448 | 24459 - | 19.4061 |
| FGF1   | chr18 | 38838673 | 38929472 - | 86541 | 86552 - | 19.4061 |
| FGF1   | chr18 | 38838673 | 38929472 - | 4991  | 5002 -  | 19.1394 |
| FGF1   | chr18 | 38838673 | 38929472 - | 5614  | 5625 -  | 14.1818 |

|        |       |          |            |       |         |         |
|--------|-------|----------|------------|-------|---------|---------|
| FGF1   | chr18 | 38838673 | 38929472 - | 86567 | 86578 - | 14.1818 |
| FGF1   | chr18 | 38838673 | 38929472 - | 8611  | 8622 -  | 13.903  |
| FGF1   | chr18 | 38838673 | 38929472 - | 23833 | 23844 - | 10.2    |
| FGF1   | chr18 | 38838673 | 38929472 - | 15754 | 15765 - | 10.1879 |
| FGF1   | chr18 | 38838673 | 38929472 - | 40801 | 40812 - | 10.1879 |
| FGF1   | chr18 | 38838673 | 38929472 - | 82249 | 82260 - | 10.1818 |
| FGF1   | chr18 | 38838673 | 38929472 - | 47493 | 47504 - | 9.91515 |
| FGF1   | chr18 | 38838673 | 38929472 - | 17785 | 17796 - | 8.95758 |
| FGF1   | chr18 | 38838673 | 38929472 - | 87746 | 87757 - | 8.95758 |
| FGF1   | chr18 | 38838673 | 38929472 - | 9070  | 9081 -  | 8.94545 |
| TM7SF2 | chr19 | 6062821  | 6068373 -  | 4188  | 4199 -  | 14.1697 |
| TM7SF2 | chr19 | 6062821  | 6068373 -  | 3140  | 3151 -  | 13.903  |
| FDPS   | chr3  | 89093588 | 89101959 - | 4536  | 4547 -  | 19.4061 |
| PMVK   | chr3  | 89454541 | 89469013 + | 11684 | 11695 + | 19.4061 |
| PMVK   | chr3  | 89454541 | 89469013 + | 886   | 897 +   | 14.4485 |
| PMVK   | chr3  | 89454541 | 89469013 + | 8537  | 8548 +  | 14.1818 |
| HMGCS2 | chr3  | 98280435 | 98310738 + | 11554 | 11565 + | 14.1818 |
| PMVK   | chr3  | 89454541 | 89469013 + | 13582 | 13593 + | 14.1818 |
| FDPS   | chr3  | 89093588 | 89101959 - | 3187  | 3198 -  | 14.1818 |
| HMGCS2 | chr3  | 98280435 | 98310738 + | 539   | 550 +   | 13.903  |
| HMGCS2 | chr3  | 98280435 | 98310738 + | 11583 | 11594 + | 13.903  |
| HMGCS2 | chr3  | 98280435 | 98310738 + | 20462 | 20473 + | 13.903  |
| FDPS   | chr3  | 89093588 | 89101959 - | 4640  | 4651 -  | 13.6364 |
| PMVK   | chr3  | 89454541 | 89469013 + | 5301  | 5312 +  | 13.6364 |
| HMGCS2 | chr3  | 98280435 | 98310738 + | 1475  | 1486 +  | 10.1879 |
| HMGCS2 | chr3  | 98280435 | 98310738 + | 14055 | 14066 + | 10.1879 |
| PMVK   | chr3  | 89454541 | 89469013 + | 9840  | 9851 +  | 9.92121 |
| PMVK   | chr3  | 89454541 | 89469013 + | 6338  | 6349 +  | 9.3697  |
| PMVK   | chr3  | 89454541 | 89469013 + | 5727  | 5738 +  | 8.95758 |
| HMGCS2 | chr3  | 98280435 | 98310738 + | 18870 | 18881 + | 8.95758 |
| HMGCS2 | chr3  | 98280435 | 98310738 + | 18907 | 18918 + | 8.95758 |
| HMGCS2 | chr3  | 98280435 | 98310738 + | 21508 | 21519 + | 8.95758 |
| PEX2   | chr3  | 5560188  | 5576239 -  | 289   | 300 -   | 8.94545 |
| PMVK   | chr3  | 89454541 | 89469013 + | 3474  | 3485 +  | 8.94545 |
| HMGCS2 | chr3  | 98280435 | 98310738 + | 3562  | 3573 +  | 8.94545 |
| PMVK   | chr3  | 89454541 | 89469013 + | 5692  | 5703 +  | 8.94545 |
| PMVK   | chr3  | 89454541 | 89469013 + | 13176 | 13187 + | 8.94545 |
| HMGCS2 | chr3  | 98280435 | 98310738 + | 25667 | 25678 + | 8.94545 |
| PRKAA2 | chr4  | 1.05E+08 | 1.05E+08 - | 4561  | 4572 -  | 19.4061 |
| PRKAA2 | chr4  | 1.05E+08 | 1.05E+08 - | 5826  | 5837 -  | 19.4061 |
| DHCR24 | chr4  | 1.07E+08 | 1.07E+08 + | 7142  | 7153 +  | 19.4061 |
| PRKAA2 | chr4  | 1.05E+08 | 1.05E+08 - | 7342  | 7353 -  | 19.4061 |
| DHCR24 | chr4  | 1.07E+08 | 1.07E+08 + | 7455  | 7466 +  | 19.4061 |
| PRKAA2 | chr4  | 1.05E+08 | 1.05E+08 - | 15952 | 15963 - | 19.4061 |
| DHCR24 | chr4  | 1.07E+08 | 1.07E+08 + | 19096 | 19107 + | 19.4061 |
| DHCR24 | chr4  | 1.07E+08 | 1.07E+08 + | 26809 | 26820 + | 19.1394 |
| PRKAA2 | chr4  | 1.05E+08 | 1.05E+08 - | 19370 | 19381 - | 14.1818 |
| PRKAA2 | chr4  | 1.05E+08 | 1.05E+08 - | 8788  | 8799 -  | 13.903  |
| PRKAA2 | chr4  | 1.05E+08 | 1.05E+08 - | 16248 | 16259 - | 13.903  |
| DHCR24 | chr4  | 1.07E+08 | 1.07E+08 + | 19352 | 19363 + | 13.903  |
| PRKAA2 | chr4  | 1.05E+08 | 1.05E+08 - | 28060 | 28071 - | 13.903  |
| PRKAA2 | chr4  | 1.05E+08 | 1.05E+08 - | 36150 | 36161 - | 13.903  |

|        |      |          |          |   |        |        |   |         |
|--------|------|----------|----------|---|--------|--------|---|---------|
| PRKAA2 | chr4 | 1.05E+08 | 1.05E+08 | - | 10459  | 10470  | - | 13.6364 |
| DHCR24 | chr4 | 1.07E+08 | 1.07E+08 | + | 24033  | 24044  | + | 13.6364 |
| PRKAA2 | chr4 | 1.05E+08 | 1.05E+08 | - | 44627  | 44638  | - | 13.6364 |
| PRKAA2 | chr4 | 1.05E+08 | 1.05E+08 | - | 55477  | 55488  | - | 13.6364 |
| PRKAA2 | chr4 | 1.05E+08 | 1.05E+08 | - | 58194  | 58205  | - | 13.6364 |
| DHCR24 | chr4 | 1.07E+08 | 1.07E+08 | + | 20712  | 20723  | + | 10.2    |
| DHCR24 | chr4 | 1.07E+08 | 1.07E+08 | + | 24024  | 24035  | + | 10.1879 |
| PRKAA2 | chr4 | 1.05E+08 | 1.05E+08 | - | 16856  | 16867  | - | 9.92121 |
| DHCR24 | chr4 | 1.07E+08 | 1.07E+08 | + | 17694  | 17705  | + | 9.92121 |
| DHCR24 | chr4 | 1.07E+08 | 1.07E+08 | + | 28058  | 28069  | + | 9.92121 |
| DHCR24 | chr4 | 1.07E+08 | 1.07E+08 | + | 3677   | 3688   | + | 9.63636 |
| PRKAA2 | chr4 | 1.05E+08 | 1.05E+08 | - | 74575  | 74586  | - | 9.63636 |
| DHCR24 | chr4 | 1.07E+08 | 1.07E+08 | + | 25338  | 25349  | + | 8.95758 |
| DHCR24 | chr4 | 1.07E+08 | 1.07E+08 | + | 25666  | 25677  | + | 8.95758 |
| PRKAA2 | chr4 | 1.05E+08 | 1.05E+08 | - | 14615  | 14626  | - | 8.95758 |
| PRKAA2 | chr4 | 1.05E+08 | 1.05E+08 | - | 51591  | 51602  | - | 8.95758 |
| PRKAA2 | chr4 | 1.05E+08 | 1.05E+08 | - | 2282   | 2293   | - | 8.94545 |
| PRKAA2 | chr4 | 1.05E+08 | 1.05E+08 | - | 11157  | 11168  | - | 8.94545 |
| PRKAA2 | chr4 | 1.05E+08 | 1.05E+08 | - | 70417  | 70428  | - | 8.94545 |
| POR    | chr5 | 1.36E+08 | 1.36E+08 | + | 9504   | 9515   | + | 19.4061 |
| POR    | chr5 | 1.36E+08 | 1.36E+08 | + | 10540  | 10551  | + | 19.4061 |
| POR    | chr5 | 1.36E+08 | 1.36E+08 | + | 12350  | 12361  | + | 19.4061 |
| POR    | chr5 | 1.36E+08 | 1.36E+08 | + | 14315  | 14326  | + | 19.4061 |
| POR    | chr5 | 1.36E+08 | 1.36E+08 | + | 21913  | 21924  | + | 19.4061 |
| POR    | chr5 | 1.36E+08 | 1.36E+08 | + | 27473  | 27484  | + | 19.4061 |
| POR    | chr5 | 1.36E+08 | 1.36E+08 | + | 39062  | 39073  | + | 19.4061 |
| POR    | chr5 | 1.36E+08 | 1.36E+08 | + | 48003  | 48014  | + | 19.4061 |
| POR    | chr5 | 1.36E+08 | 1.36E+08 | + | 51746  | 51757  | + | 19.4061 |
| POR    | chr5 | 1.36E+08 | 1.36E+08 | + | 52453  | 52464  | + | 19.4061 |
| MVK    | chr5 | 1.14E+08 | 1.14E+08 | + | 1303   | 1314   | + | 19.1394 |
| POR    | chr5 | 1.36E+08 | 1.36E+08 | + | 63902  | 63913  | + | 14.1818 |
| POR    | chr5 | 1.36E+08 | 1.36E+08 | + | 37137  | 37148  | + | 14.1697 |
| POR    | chr5 | 1.36E+08 | 1.36E+08 | + | 58084  | 58095  | + | 14.1697 |
| POR    | chr5 | 1.36E+08 | 1.36E+08 | + | 8498   | 8509   | + | 13.903  |
| MVK    | chr5 | 1.14E+08 | 1.14E+08 | + | 10356  | 10367  | + | 13.903  |
| POR    | chr5 | 1.36E+08 | 1.36E+08 | + | 16995  | 17006  | + | 13.903  |
| POR    | chr5 | 1.36E+08 | 1.36E+08 | + | 53534  | 53545  | + | 13.903  |
| CYP51  | chr5 | 4081145  | 4104746  | - | 16381  | 16392  | - | 13.6364 |
| MVK    | chr5 | 1.14E+08 | 1.14E+08 | + | 9366   | 9377   | + | 10.2    |
| POR    | chr5 | 1.36E+08 | 1.36E+08 | + | 31149  | 31160  | + | 9.92121 |
| CYP51  | chr5 | 4081145  | 4104746  | - | 782    | 793    | - | 9.63636 |
| INSIG1 | chr5 | 28071363 | 28078662 | + | 1150   | 1161   | + | 9.63636 |
| POR    | chr5 | 1.36E+08 | 1.36E+08 | + | 8308   | 8319   | + | 8.95758 |
| POR    | chr5 | 1.36E+08 | 1.36E+08 | + | 65004  | 65015  | + | 8.95758 |
| POR    | chr5 | 1.36E+08 | 1.36E+08 | + | 60203  | 60214  | + | 8.69091 |
| CFTR   | chr6 | 18170687 | 18322768 | + | 45709  | 45720  | + | 19.4061 |
| CFTR   | chr6 | 18170687 | 18322768 | + | 73262  | 73273  | + | 19.4061 |
| CFTR   | chr6 | 18170687 | 18322768 | + | 53218  | 53229  | + | 14.1818 |
| CFTR   | chr6 | 18170687 | 18322768 | + | 17967  | 17978  | + | 14.1697 |
| CFTR   | chr6 | 18170687 | 18322768 | + | 26198  | 26209  | + | 13.903  |
| CFTR   | chr6 | 18170687 | 18322768 | + | 67658  | 67669  | + | 13.903  |
| CFTR   | chr6 | 18170687 | 18322768 | + | 130856 | 130867 | + | 13.903  |



|       |      |          |          |   |        |        |   |         |
|-------|------|----------|----------|---|--------|--------|---|---------|
| CFTR  | chr6 | 18170687 | 18322768 | + | 139632 | 139643 | + | 13.903  |
| CFTR  | chr6 | 18170687 | 18322768 | + | 40486  | 40497  | + | 13.6364 |
| CFTR  | chr6 | 18170687 | 18322768 | + | 13868  | 13879  | + | 9.92121 |
| CFTR  | chr6 | 18170687 | 18322768 | + | 87392  | 87403  | + | 9.92121 |
| CFTR  | chr6 | 18170687 | 18322768 | + | 128615 | 128626 | + | 9.92121 |
| CFTR  | chr6 | 18170687 | 18322768 | + | 3254   | 3265   | + | 9.63636 |
| CFTR  | chr6 | 18170687 | 18322768 | + | 113604 | 113615 | + | 9.63636 |
| APOE  | chr7 | 19696109 | 19699188 | - | 2032   | 2043   | - | 13.903  |
| DHCR7 | chr7 | 1.44E+08 | 1.44E+08 | + | 21081  | 21092  | + | 13.6364 |
| APOE  | chr7 | 19696109 | 19699188 | - | 1095   | 1106   | - | 9.92121 |
| APOE  | chr7 | 19696109 | 19699188 | - | 971    | 982    | - | 9.90303 |
| DHCR7 | chr7 | 1.44E+08 | 1.44E+08 | + | 9246   | 9257   | + | 9.63636 |
| DHCR7 | chr7 | 1.44E+08 | 1.44E+08 | + | 22981  | 22992  | + | 8.94545 |
| MVD   | chr8 | 1.22E+08 | 1.22E+08 | - | 8149   | 8160   | - | 19.4061 |
| MVD   | chr8 | 1.22E+08 | 1.22E+08 | - | 871    | 882    | - | 13.9152 |
| MVD   | chr8 | 1.22E+08 | 1.22E+08 | - | 7635   | 7646   | - | 10.1879 |
| MVD   | chr8 | 1.22E+08 | 1.22E+08 | - | 2109   | 2120   | - | 9.63636 |
| MVD   | chr8 | 1.22E+08 | 1.22E+08 | - | 2847   | 2858   | - | 9.63636 |
| MVD   | chr8 | 1.22E+08 | 1.22E+08 | - | 6599   | 6610   | - | 9.3697  |
| MVD   | chr8 | 1.22E+08 | 1.22E+08 | - | 1858   | 1869   | - | 8.94545 |
| MVD   | chr8 | 1.22E+08 | 1.22E+08 | - | 3767   | 3778   | - | 8.94545 |
| MVD   | chr8 | 1.22E+08 | 1.22E+08 | - | 8560   | 8571   | - | 8.94545 |
| SC5D  | chr9 | 42251595 | 42264256 | - | 9646   | 9657   | - | 19.4061 |
| SCAP  | chr9 | 1.1E+08  | 1.1E+08  | + | 21457  | 21468  | + | 19.4061 |
| SCAP  | chr9 | 1.1E+08  | 1.1E+08  | + | 24564  | 24575  | + | 19.4061 |
| SCAP  | chr9 | 1.1E+08  | 1.1E+08  | + | 27874  | 27885  | + | 19.4061 |
| SCAP  | chr9 | 1.1E+08  | 1.1E+08  | + | 35779  | 35790  | + | 19.4061 |
| SCAP  | chr9 | 1.1E+08  | 1.1E+08  | + | 48120  | 48131  | + | 15.1394 |
| SCAP  | chr9 | 1.1E+08  | 1.1E+08  | + | 42709  | 42720  | + | 14.1818 |
| SC5D  | chr9 | 42251595 | 42264256 | - | 3646   | 3657   | - | 14.1697 |
| SC5D  | chr9 | 42251595 | 42264256 | - | 3194   | 3205   | - | 13.903  |
| SC5D  | chr9 | 42251595 | 42264256 | - | 4214   | 4225   | - | 13.903  |
| SC5D  | chr9 | 42251595 | 42264256 | - | 7355   | 7366   | - | 13.903  |
| SCAP  | chr9 | 1.1E+08  | 1.1E+08  | + | 8011   | 8022   | + | 13.903  |
| SCAP  | chr9 | 1.1E+08  | 1.1E+08  | + | 8937   | 8948   | + | 13.903  |
| SCAP  | chr9 | 1.1E+08  | 1.1E+08  | + | 17402  | 17413  | + | 13.6364 |
| SCAP  | chr9 | 1.1E+08  | 1.1E+08  | + | 42020  | 42031  | + | 10.1879 |
| SCAP  | chr9 | 1.1E+08  | 1.1E+08  | + | 23965  | 23976  | + | 9.92121 |
| SC5D  | chr9 | 42251595 | 42264256 | - | 9126   | 9137   | - | 9.91515 |
| SCAP  | chr9 | 1.1E+08  | 1.1E+08  | + | 32656  | 32667  | + | 8.95758 |
| SCAP  | chr9 | 1.1E+08  | 1.1E+08  | + | 42529  | 42540  | + | 8.95758 |
| SCAP  | chr9 | 1.1E+08  | 1.1E+08  | + | 45595  | 45606  | + | 8.95758 |
| SC5D  | chr9 | 42251595 | 42264256 | - | 4911   | 4922   | - | 8.95758 |
| SC5D  | chr9 | 42251595 | 42264256 | - | 6830   | 6841   | - | 8.95758 |
| SCAP  | chr9 | 1.1E+08  | 1.1E+08  | + | 29519  | 29530  | + | 8.94545 |
| SCAP  | chr9 | 1.1E+08  | 1.1E+08  | + | 29894  | 29905  | + | 8.94545 |
| SCAP  | chr9 | 1.1E+08  | 1.1E+08  | + | 432    | 443    | + | 8.69091 |
| SC5D  | chr9 | 42251595 | 42264256 | - | 8417   | 8428   | - | 8.69091 |
| EBP   | chrX | 8185329  | 8193512  | - | 4374   | 4385   | - | 19.4061 |
| EBP   | chrX | 8185329  | 8193512  | - | 4753   | 4764   | - | 19.4061 |
| G6PDX | chrX | 74409483 | 74429194 | - | 9600   | 9611   | - | 19.4061 |
| G6PDX | chrX | 74409483 | 74429194 | - | 10174  | 10185  | - | 19.4061 |

|       |      |          |            |       |         |         |
|-------|------|----------|------------|-------|---------|---------|
| G6PDX | chrX | 74409483 | 74429194 - | 10980 | 10991 - | 19.4061 |
| NSDHL | chrX | 72918557 | 72958514 + | 10808 | 10819 + | 14.1697 |
| NSDHL | chrX | 72918557 | 72958514 + | 9757  | 9768 +  | 13.903  |
| NSDHL | chrX | 72918557 | 72958514 + | 11441 | 11452 + | 13.903  |
| NSDHL | chrX | 72918557 | 72958514 + | 12620 | 12631 + | 13.903  |
| NSDHL | chrX | 72918557 | 72958514 + | 34301 | 34312 + | 13.903  |
| NSDHL | chrX | 72918557 | 72958514 + | 34970 | 34981 + | 13.903  |
| NSDHL | chrX | 72918557 | 72958514 + | 8668  | 8679 +  | 9.92121 |
| G6PDX | chrX | 74409483 | 74429194 - | 10552 | 10563 - | 8.94545 |
| NSDHL | chrX | 72918557 | 72958514 + | 23530 | 23541 + | 8.94545 |
| NSDHL | chrX | 72918557 | 72958514 + | 30332 | 30343 + | 8.94545 |

## P-value

4.38E-06  
1.75E-05  
1.75E-05  
2.19E-05  
2.34E-05  
2.48E-05  
2.96E-05  
5.60E-05  
5.60E-05  
7.18E-05  
5.04E-07  
2.96E-05  
5.60E-05  
5.60E-05  
5.60E-05  
7.18E-05  
5.04E-07  
5.04E-07  
5.04E-07  
5.04E-07  
5.04E-07  
5.04E-07  
5.04E-07  
7.37E-06  
1.75E-05  
1.75E-05  
1.75E-05  
1.75E-05  
2.19E-05  
2.19E-05  
3.64E-05  
4.88E-05  
4.88E-05  
4.88E-05  
5.25E-05  
5.25E-05  
5.33E-05  
5.60E-05  
5.60E-05  
7.18E-05  
7.18E-05  
7.18E-05  
7.18E-05  
7.18E-05  
7.31E-05  
7.31E-05  
5.04E-07  
1.71E-06  
1.75E-05  
2.19E-05  
3.64E-05  
5.04E-07

5.04E-07  
5.04E-07  
5.04E-07  
4.38E-06  
1.75E-05  
1.75E-05  
1.75E-05  
1.75E-05  
2.19E-05  
2.48E-05  
4.88E-05  
5.04E-07  
5.04E-07  
4.38E-06  
1.75E-05  
3.64E-05  
3.64E-05  
7.18E-05  
5.04E-07  
5.04E-07  
1.75E-05  
1.75E-05  
1.75E-05  
1.75E-05  
1.75E-05  
1.75E-05  
1.75E-05  
1.75E-05  
3.64E-05  
4.05E-05  
4.88E-05  
7.18E-05  
2.19E-05  
3.64E-05  
7.18E-05  
5.04E-07  
5.04E-07  
5.04E-07  
5.04E-07  
6.88E-07  
2.37E-06  
1.75E-05  
1.75E-05  
1.75E-05  
3.81E-05  
4.88E-05  
7.18E-05  
5.04E-07  
5.04E-07  
5.04E-07  
6.88E-07  
4.38E-06

4.38E-06  
1.75E-05  
2.48E-05  
2.96E-05  
2.96E-05  
3.02E-05  
3.81E-05  
5.60E-05  
5.60E-05  
7.18E-05  
7.37E-06  
1.75E-05  
5.04E-07  
5.04E-07  
2.37E-06  
4.38E-06  
4.38E-06  
4.38E-06  
4.38E-06  
1.75E-05  
1.75E-05  
1.75E-05  
2.19E-05  
2.19E-05  
2.96E-05  
2.96E-05  
3.64E-05  
5.25E-05  
5.60E-05  
5.60E-05  
5.60E-05  
5.60E-05  
7.18E-05  
7.18E-05  
7.18E-05  
7.18E-05  
7.18E-05  
7.18E-05  
5.04E-07  
5.04E-07  
5.04E-07  
5.04E-07  
5.04E-07  
5.04E-07  
5.04E-07  
6.88E-07  
4.38E-06  
1.75E-05  
1.75E-05  
1.75E-05  
1.75E-05  
1.75E-05

2.19E-05  
2.19E-05  
2.19E-05  
2.19E-05  
2.19E-05  
2.48E-05  
2.96E-05  
3.64E-05  
3.64E-05  
3.64E-05  
4.88E-05  
4.88E-05  
5.60E-05  
5.60E-05  
5.60E-05  
5.60E-05  
7.18E-05  
7.18E-05  
7.18E-05  
5.04E-07  
6.88E-07  
4.38E-06  
7.37E-06  
7.37E-06  
1.75E-05  
1.75E-05  
1.75E-05  
1.75E-05  
2.19E-05  
2.48E-05  
3.64E-05  
4.88E-05  
4.88E-05  
5.60E-05  
5.60E-05  
7.31E-05  
5.04E-07  
5.04E-07  
4.38E-06  
7.37E-06  
1.75E-05  
1.75E-05  
1.75E-05

1.75E-05  
2.19E-05  
3.64E-05  
3.64E-05  
3.64E-05  
4.88E-05  
4.88E-05  
1.75E-05  
2.19E-05  
3.64E-05  
4.05E-05  
4.88E-05  
7.18E-05  
5.04E-07  
8.35E-06  
2.96E-05  
4.88E-05  
4.88E-05  
5.25E-05  
7.18E-05  
7.18E-05  
7.18E-05  
5.04E-07  
5.04E-07  
5.04E-07  
5.04E-07  
5.04E-07  
1.56E-06  
4.38E-06  
7.37E-06  
1.75E-05  
1.75E-05  
1.75E-05  
1.75E-05  
1.75E-05  
2.19E-05  
2.96E-05  
3.64E-05  
3.81E-05  
5.60E-05  
5.60E-05  
5.60E-05  
5.60E-05  
5.60E-05  
7.18E-05  
7.18E-05  
7.31E-05  
7.31E-05  
5.04E-07  
5.04E-07  
5.04E-07  
5.04E-07

5.04E-07  
7.37E-06  
1.75E-05  
1.75E-05  
1.75E-05  
1.75E-05  
1.75E-05  
3.64E-05  
7.18E-05  
7.18E-05  
7.18E-05



| Gene name | Total FIMO score | PAR-CLIP |
|-----------|------------------|----------|
| POR       | 314.81848        | 0        |
| PRKAA2    | 266.27288        | 7        |
| SCAP      | 221.95166        | 1        |
| FGF1      | 197.15766        | 0        |
| CFTR      | 185.44845        | 0        |
| ABCG1     | 181.41826        | 1        |
| DHCR24    | 172.67894        | 2        |
| SREBF1    | 163.82426        | 0        |
| CYB5R3    | 131.30894        | 0        |
| PMVK      | 130.93944        | 1        |
| SEC14L2   | 130.1334         | 0        |
| HMGCS2    | 121.03024        | 0        |
| SC5D      | 111.80602        | 0        |
| NSDHL     | 111.49681        | 0        |
| MVD       | 98.98797         | 0        |
| FDFT1     | 95.68487         | 2        |
| IDI2      | 80.2546          | 0        |
| INSIG2    | 76.57583         | 0        |
| APOB      | 71.73941         | 0        |
| G6PDX     | 67.16375         | 0        |
| HMGCS1    | 66.897           | 3        |
| NPC1L1    | 66.3516          | 0        |
| LSS       | 65.41219         | 2        |
| PRKAA1    | 57.13331         | 0        |
| FDPS      | 47.2243          | 0        |
| MVK       | 43.2424          | 0        |
| EBP       | 38.8122          | 0        |
| HSD17B7   | 36.76358         | 0        |
| HMGCR     | 33.73936         | 1        |
| APOE      | 33.72724         | 0        |
| SOD1      | 32.50306         | 1        |
| DHCR7     | 32.21821         | 0        |
| TM7SF2    | 28.0727          | 0        |
| CYP51     | 23.27276         | 0        |
| INSIG1    | 9.63636          | 1        |
| PEX2      | 8.94545          | 2        |

**6 weeks WB**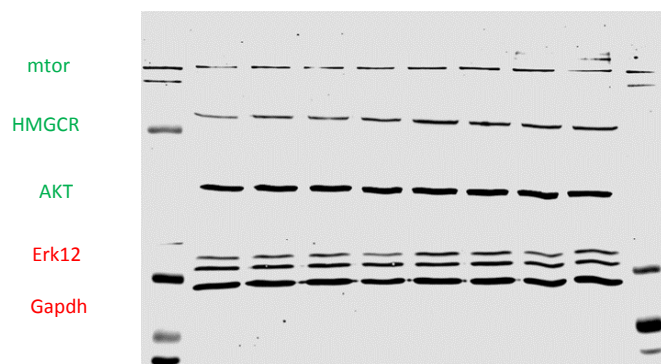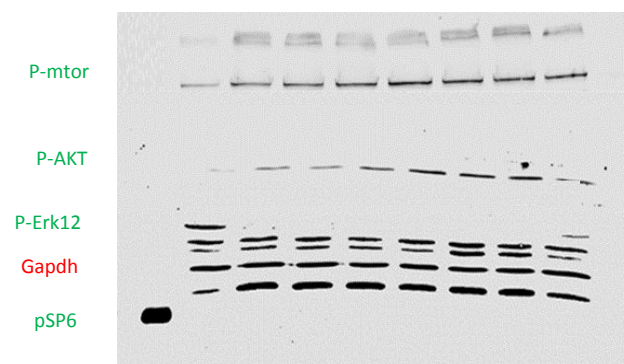**28 weeks WB**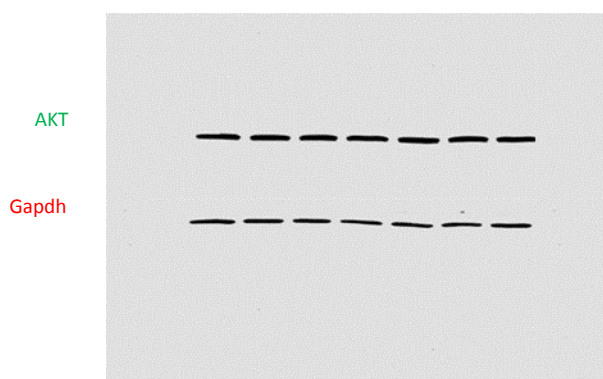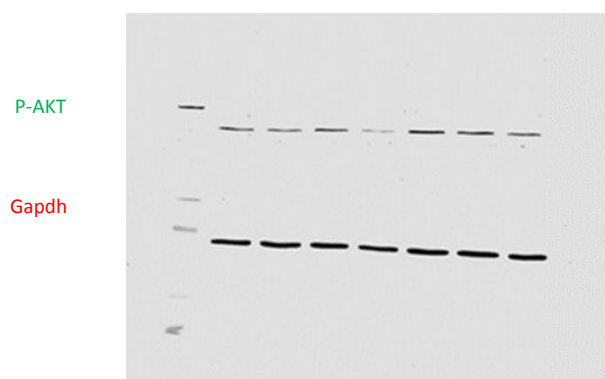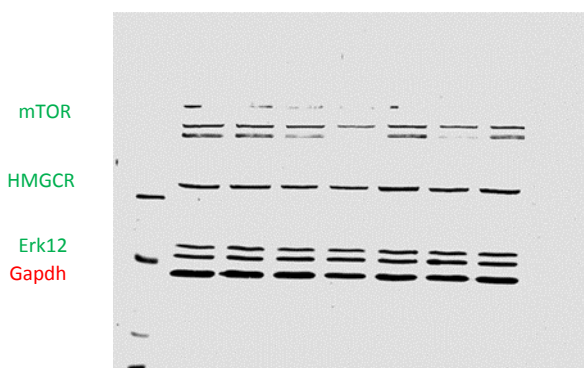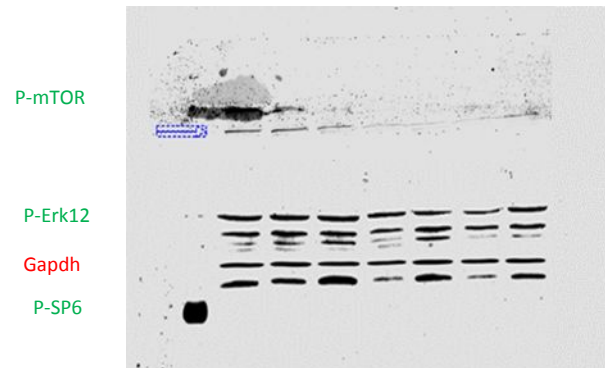

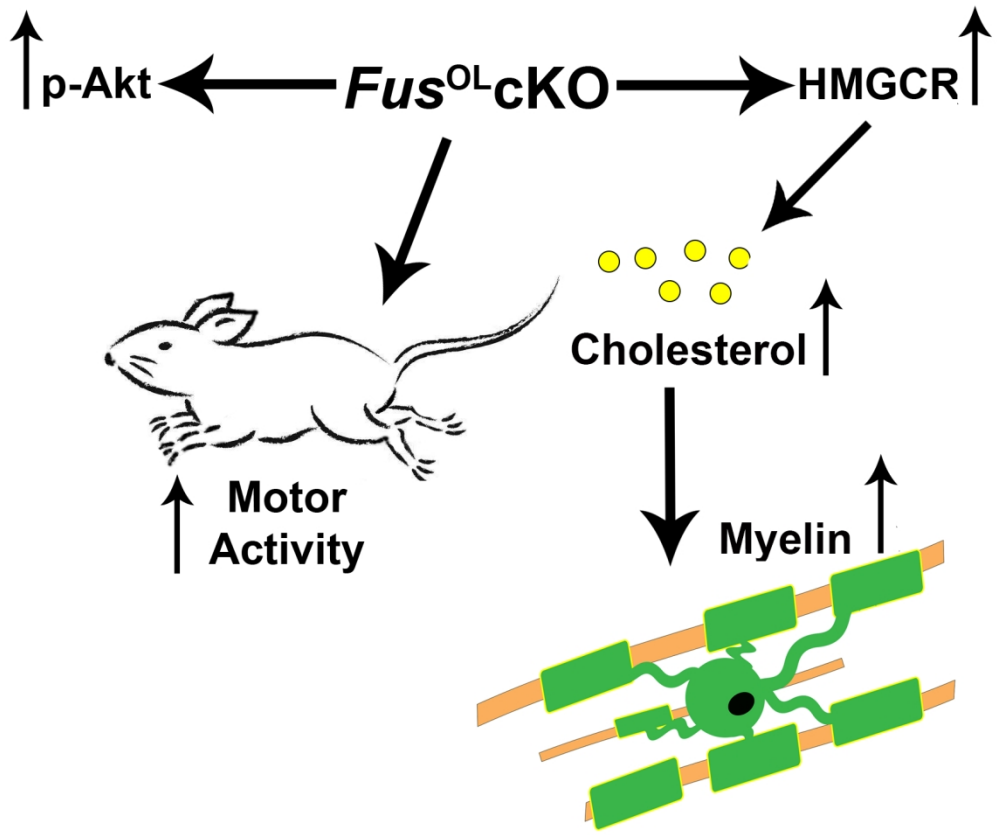

146x122mm (300 x 300 DPI)
